# Supplementary material for: Remodeling of Retinal Arterioles and Carotid Arteries in Heart Failure Development—A Preliminary Study
Source: MDPI journal article supplement (doi:10.3390/jcm11133721), 2022-06-27
Supplement: s1 [file s1]

**Supplementary Table S1.** Differences in retinal, carotid, and echocardiographic markers between HFpEF and control groups.

| <b>Variable</b>           | <b>HFpEF group<br/><i>n</i>=14</b> | <b>Control group<br/><i>n</i>=14</b> | <b><math>\Delta_{\text{median}}</math></b> | <b><i>P</i></b>  |
|---------------------------|------------------------------------|--------------------------------------|--------------------------------------------|------------------|
| Hemoglobin (g/dl)         | 12.4 [11.9-14.0]                   | 14.1 [13.6-16.0]                     | -1.7                                       | <b>0.02</b>      |
| Na (mmol/L)               | 140 [138-142]                      | 143 [142-144]                        | -3                                         | <b>0.02</b>      |
| Creatinine (mg/dl)        | 0.9 [0.9-1.2]                      | 0.8 [0.7-0.9]                        | 0.1                                        | <b>0.03</b>      |
| eGFR (ml/min)             | 62.1 [44.9-79.5]                   | 83.3 [79.5-98.1]                     | -21.2                                      | <b>0.01</b>      |
| hsTnT(ng/ml)              | 0.014 [0.011-0.019]                | 0.005 [0.003-0.007]                  | 0.009                                      | <b>&lt;0.001</b> |
| NT-proBNP (pg/ml)         | 616 [185-2854]                     | 93 [55-159]                          | 523                                        | <b>0.002</b>     |
| Total cholesterol (mg/dl) | 170 [160-187]                      | 186 [180-228]                        | -16                                        | <b>0.009</b>     |
| LDL-C (mg/dl)             | 88 [69-92]                         | 101 [74-154]                         | -13                                        | 0.3              |
| Triglycerides (mg/dl)     | 95 [70-132]                        | 107 [90-146]                         | -12                                        | 0.4              |

Values are expressed as median and interquartile range.  $\Delta$  stands for difference in median between HFpEF and control groups. *P* stands for Mann–Whitney U-test. HFpEF – heart failure with preserved ejection fraction; eGFR<sub>MDRD</sub> – estimated glomerular filtration rate; hsTnT – high-sensitivity troponin T; NT-proBNP – N-terminal prohormone of brain natriuretic peptide; LDL-C – low-density lipoprotein cholesterol.
